# Supplementary material
Source: PubMed Central journal article supplement (PMC5034733)
Supplement: NIHMS817157-supplement-01.pdf [file NIHMS817157-supplement-01.pdf]

- Sprando RL, Santulli R, Awoniyi CA, Ewing LL & Zirkin BR. (1990) Does ethane 1,2-dimethanesulphonate (EDS) have a direct cytotoxic effect on the seminiferous epithelium of the rat testis? *J Androl* 11, 344–352.
- Trasler JM, Hales BF & Robaire B. (1986) Chronic low dose cyclophosphamide treatment of adult male rats: effect on fertility, pregnancy outcome and progeny. *Biol Reprod* 34, 275–283.
- Trost LW & Brannigan RE. (2012) Oncofertility and the male cancer patient. *Curr Treat Options Oncol* 13, 146–160.
- Wang D, Li H, Yuan H, Zheng M, Bai C, Chen L & Pei X. (2005) Humanin delays apoptosis in K562 cells by downregulation of P38 MAP kinase. *Apoptosis* 10, 963–971.
- Woolveridge I, de Boer-Brouwer M, Taylor MF, Teerds KJ, Wu FC & Morris ID. (1999) Apoptosis in the rat spermatogenic epithelium following androgen withdrawal: changes in apoptosis-related genes. *Biol Reprod* 60, 461–470.
- Xu X, Chua CC, Gao J, Hamdy RC & Chua BH. (2006) Humanin is a novel neuroprotective agent against stroke. *Stroke* 37, 2613–2619.
- Xu X, Chua KW, Chua CC, Liu CF, Hamdy RC & Chua BH. (2010) Synergistic protective effects of humanin and necrostatin-1 on hypoxia and ischemia/reperfusion injury. *Brain Res* 1355, 189–194.
- Yazawa H, Sasagawa I & Nakada T. (2000) Apoptosis of testicular germ cells induced by exogenous glucocorticoid in rats. *Hum Reprod* 15, 1917–1920.

## SUPPORTING INFORMATION

Additional Supporting Information may be found in the online version of this article:

**Figure S1.** Representative micrographs of testicular sections from rats pre-treated with EDS (A), and pre-treated with EDS and then treated with HN for 12 h (B). Absence of Leydig cells induced by EDS treatment (A, red arrow) were not rescued by HN (B, red arrows). HN treatment decreased EDS-induced germ cell apoptosis (B, black arrows) as compared with EDS treatment alone (A, black arrows). Scale bar = 100 micrometer.
